# Supplementary material
Source: Springer Nature journal article supplement (https://www.springermedizin.de/resource/supplementary/12962_2013_198_MOESM5_ESM.pdf/9571898)

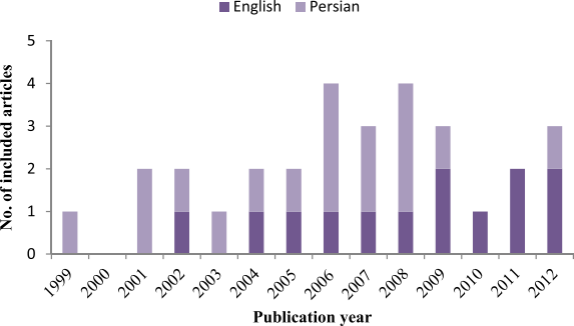

Supplement: MOESM5 [file 9571898]
